# Supplementary material for: Profiling the Blood Compartment of Hematopoietic Stem Cell Transplant Patients During Human Cytomegalovirus Reactivation
Source: PubMed Central journal article supplement (PMC7820775; doi:10.3389/fcimb.2020.607470), 2021-01-08

# Supplementary Figure 1

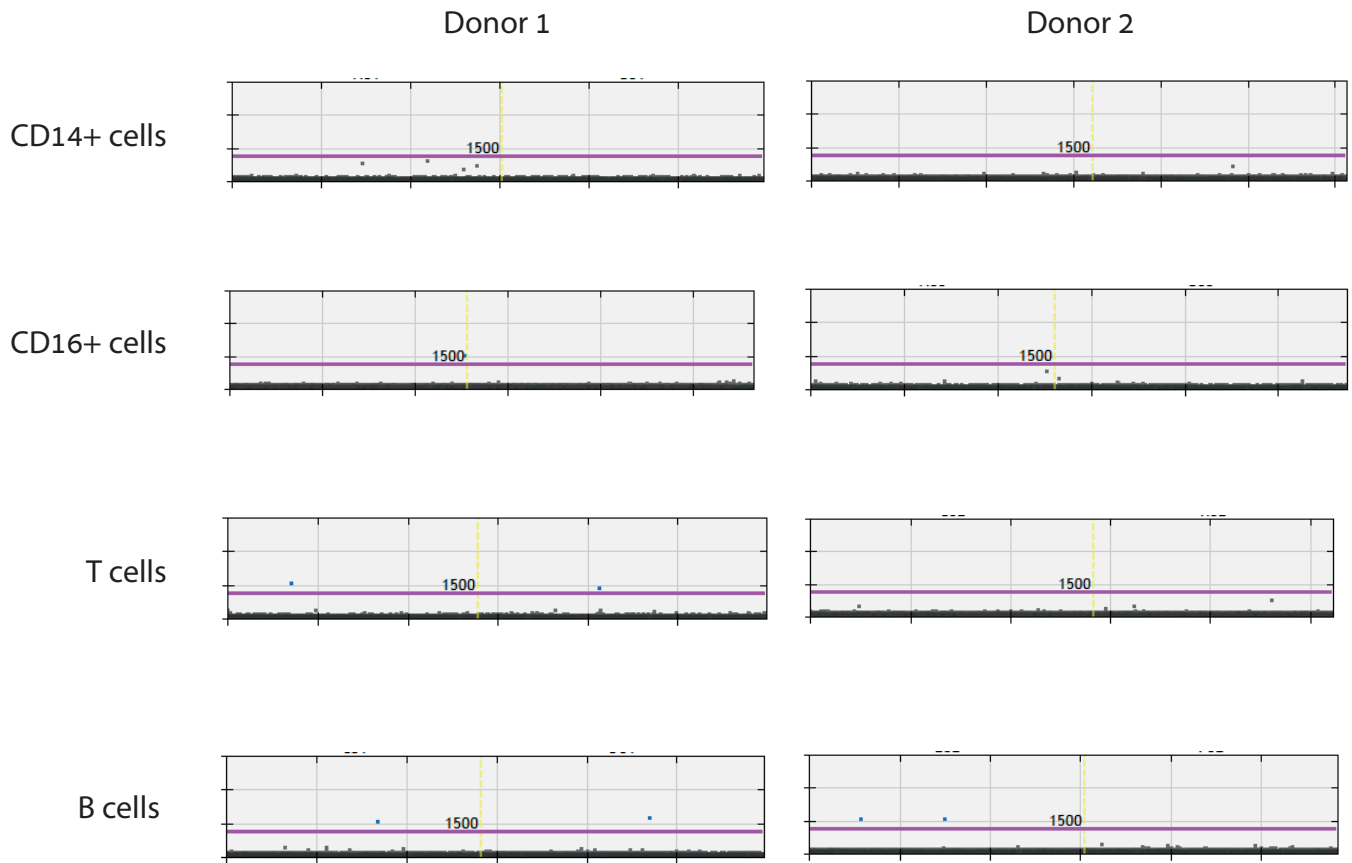

Supplement: DataSheet_1.pdf [file DataSheet_1.pdf]
